# Supplementary material for: Lipid‐lowering treatment patterns in patients with new cardiovascular events – estimates from population‐based register data in Sweden
Source: PubMed Central journal article supplement — Int J Clin Pract. 2016 Jan 22;70(3):222–8. doi: 10.1111/ijcp.12769 (PMC4819716; doi:10.1111/ijcp.12769), 2016-01-22
Supplement: IJCP-70-222-s001.pdf [file IJCP-70-222-s001.pdf]

# Lipid-lowering treatment patterns in patients with new cardiovascular events - estimates from population-based register data in Sweden

## - Supplementary material

### Appendix A. Codes for diagnoses and medication

**Table 1. Diagnoses for cohort stratification**

| Disease/Procedure            | ICD-10 code/KVÅ code                                      |
|------------------------------|-----------------------------------------------------------|
| Myocardial Infarction        | I21; I22; I23                                             |
| Unstable angina pectoris     | I20.0                                                     |
| Ischemic stroke              | I63; I65; I66; I67.2; I167.8                              |
| Diabetes                     | E10; E11; E12; E13; E14                                   |
| Peripheral artery disease    | I70; I71; I74                                             |
| Abdominal aortic aneurysm    | I71.3; I71.4                                              |
| Transient ischemic attack    | G45.9                                                     |
| Angina pectoris              | I20.1-9; I25.1                                            |
| Revascularization procedures | FND10-20; FNG02; FNG05; PCQ10; PCQ20; PCQ30; PCQ40; PCQ99 |

**Table 2. Diagnoses for CV events**

| Disease/Procedure            | ICD-10 code/KVÅ code                                      |
|------------------------------|-----------------------------------------------------------|
| Myocardial Infarction        | I21; I22; I23                                             |
| Unstable angina pectoris     | I20.0                                                     |
| Ischemic stroke              | I63; I65; I66; I67.2; I167.8                              |
| Heart failure                | I50                                                       |
| Transient ischemic attack    | G45.9                                                     |
| Revascularization procedures | FND10-20; FNG02; FNG05; PCQ10; PCQ20; PCQ30; PCQ40; PCQ99 |

**Table 3. Charlson Comorbidity Index**

| Disease                     | ICD-10 code                                                              | Score |
|-----------------------------|--------------------------------------------------------------------------|-------|
| Myocardial Infarction       | I21; I22; I23                                                            | 1     |
| Congestive Heart Failure    | I50; I11.0; I13.0; I13.2                                                 | 1     |
| Peripheral Vascular Disease | I70; I71; I72; I73; I74; I77                                             | 1     |
| Cerebrovascular Disease     | I60-I69; G45; G46                                                        | 1     |
| Dementia                    | F00-F03; F05.1; G30                                                      | 1     |
| Chronic Pulmonary Disease   | J40-J47; J60-J67; J68.4; J70.1; J70.3; J84.1; J92.0; J96.1; J98.2; J98.3 | 1     |
| Connective Tissue Disease   | M05; M06; M08; M09; M30; M31; M32; M33; M34; M35; M36; D86               | 1     |
| Ulcer Disease               | K22.1; K25-K28                                                           | 1     |
| Mild Liver Disease          | B18; K70.0; K70.3; K70.9; K71; K73; K74; K76.0                           | 1     |
| Diabetes Mellitus           |                                                                          | 1     |
| Insulin dependent           | E10.0; E10.1; E10.9                                                      |       |
| Non-Insulin dependent       | E11.0; E11.1; E11.9                                                      |       |

|                                         |                                                    |   |
|-----------------------------------------|----------------------------------------------------|---|
| Hemiplegia or paraplegia                | G81; G82                                           | 2 |
| Moderate-Severe Renal Disease           | I12; I13; N00-N05; N07; N11; N14; N17-N19; Q61     | 2 |
| Diabetes Mellitus with End Organ Damage |                                                    | 2 |
| Insulin dependent                       | E10.2-E10.8                                        |   |
| Non-Insulin dependent                   | E11.2-E11.8                                        |   |
| Any Tumor                               | C00-C75                                            | 2 |
| Leukemia                                | C91-C95                                            | 2 |
| Lymphoma                                | C81-C85; C88; C90; C96                             | 2 |
| Moderate-Severe Liver Disease           | B15.0; B16.0; B16.2; B19.0; K70.4; K72; K76.6; I85 | 3 |
| Metastatic Solid Tumor                  | C76-C80                                            | 6 |
| AIDS                                    | B21-B24                                            | 6 |
